# Supplementary material
Source: PubMed Central journal article supplement (PMC9633607)
Supplement: 41467_2022_34235_MOESM2_ESM.pdf [file 41467_2022_34235_MOESM2_ESM.pdf]

**Title:** Supplementary Dataset 1:

**Description:** This file contains data to plot graphs in figure 1.

**Title:** Supplementary Dataset 2:

**Description:** This file contains data to plot graphs in figure 2.

**Title:** Supplementary Dataset 3:

**Description:** This file contains data to plot graphs in figure 4.

**Title:** Supplementary Dataset 4:

**Description:** This file contains data to plot graphs in figure 5.

**Title:** Supplementary Movie 1.

**Description:** AMF assisted self-healing of magnetoresistive paste with a micrometer-scaled crack.

**Title:** Supplementary Movie 2.

**Description:** AMF assisted self-healing of magnetoresistive sensor connected into a circuit.

**Title:** Supplementary Movie 3.

**Description:** AMF assisted self-healing of magnetoresistive sensor with a millimeter-scaled gap submerged into deionized water.

**Title:** Supplementary Movie 4.

**Description:** Dynamics of 27 magnetic particles in 1 kHz magnetic field.

**Title:** Supplementary Movie 5.

**Description:** Interaction of magnetic microparticles in paste under AMF.

**Title:** Supplementary Movie 6.

**Description:** Printed magnetoresistive sensor for safety application.

**Title:** Supplementary Movie 7.

**Description:** Printed magnetoresistive sensor for human- machine interface in augmented reality.

**Title:** Supplementary Movie 8.

**Description:** Different responsive speeds.
